# Supplementary material
Source: Springer Nature journal article supplement (https://www.springermedizin.de/resource/supplementary/12885_2014_4731_MOESM9_ESM.pdf/9467088)
Supplement: MOESM9 [file 9467088]

## A. ECM Glycoproteins

|          | Normal Colon | Normal Liver | Colon Tumor | Liver Tumor | Met. |
|----------|--------------|--------------|-------------|-------------|------|
| DPT      |              |              |             |             |      |
| ECM1     |              |              |             |             |      |
| EFEMP1   |              |              |             |             |      |
| ELN      |              |              |             |             |      |
| EMILIN1  |              |              |             |             |      |
| EMILIN2  |              |              |             |             |      |
| FBLN1    |              |              |             |             |      |
| FBLN2    |              |              |             |             |      |
| FBLN5    |              |              |             |             |      |
| FBN1     |              |              |             |             |      |
| FGA      |              |              |             |             |      |
| FGB      |              |              |             |             |      |
| FGG      |              |              |             |             |      |
| FN1      |              |              |             |             |      |
| LAMA4    |              |              |             |             |      |
| LAMA5    |              |              |             |             |      |
| LAMB1    |              |              |             |             |      |
| LAMB2    |              |              |             |             |      |
| LAMC1    |              |              |             |             |      |
| LTBP1    |              |              |             |             |      |
| MFAP4    |              |              |             |             |      |
| NID1     |              |              |             |             |      |
| POSTN    |              |              |             |             |      |
| TGFBI    |              |              |             |             |      |
| TINAGL1  |              |              |             |             |      |
| TNC      |              |              |             |             |      |
| TNXB     |              |              |             |             |      |
| VTN      |              |              |             |             |      |
| NPNT     |              |              |             |             |      |
| THSD4    |              |              |             |             |      |
| VWA1     |              |              |             |             |      |
| IGFBP7   | -            |              |             |             |      |
| AEBP1    |              | -            |             |             |      |
| LAMB3    |              |              |             |             |      |
| LAMC2    |              |              |             |             |      |
| LTBP4    |              |              |             |             |      |
| MFAP2    |              |              |             |             |      |
| MFAP5    |              |              |             |             |      |
| SRPX2    |              |              |             |             |      |
| SRPX     |              |              |             |             |      |
| LAMA2    |              |              |             |             |      |
| MATN2    |              |              |             |             |      |
| VWF      |              |              |             |             |      |
| AGRN     |              |              |             |             |      |
| EFEMP2   |              |              |             |             |      |
| HMCN1    |              |              |             |             |      |
| LTBP2    |              |              |             |             |      |
| MXRA5    |              |              |             |             |      |
| PXDN     |              |              |             |             |      |
| THBS2    |              |              |             |             |      |
| EMILIN3  |              |              |             |             |      |
| C15orf44 |              |              |             |             |      |
| EMID1    |              |              |             |             |      |
| FGL2     |              |              |             |             |      |
| MFGE8    |              |              |             |             |      |
| MMRN1    |              |              |             |             |      |
| MMRN2    |              |              |             |             |      |
| PAPLN    |              |              |             |             |      |
| SPARC    |              |              |             |             |      |
| SVEP1    |              |              |             |             |      |
| COMP     |              |              |             |             |      |
| FNDC1    |              |              |             |             |      |
| IGFALS   |              |              |             |             |      |
| SPP1     |              |              |             |             |      |

## B. Collagens

|         | Normal Colon | Normal Liver | Colon Tumor | Liver Tumor | Met. |
|---------|--------------|--------------|-------------|-------------|------|
| COL10A1 |              |              |             |             |      |
| COL12A1 |              |              |             |             |      |
| COL14A1 |              |              |             |             |      |
| COL16A1 |              |              |             |             |      |
| COL18A1 |              |              |             |             |      |
| COL1A1  |              |              |             |             |      |
| COL1A2  |              |              |             |             |      |
| COL28A1 |              |              |             |             |      |
| COL3A1  |              |              |             |             |      |
| COL4A1  |              |              |             |             |      |
| COL4A2  |              |              |             |             |      |
| COL4A3  |              |              |             |             |      |
| COL5A1  |              |              |             |             |      |
| COL5A2  |              |              |             |             |      |
| COL6A1  |              |              |             |             |      |
| COL6A2  |              |              |             |             |      |
| COL6A3  |              |              |             |             |      |
| COL7A1  |              |              |             |             |      |
| COL15A1 |              | -            |             |             |      |
| COL19A1 |              | -            |             |             |      |
| COL25A1 |              | -            |             |             |      |
| COL4A4  |              | -            |             |             |      |
| COL4A6  |              | -            |             |             |      |
| COL8A1  |              | -            |             |             |      |
| COL8A2  |              | -            |             |             |      |
| COL9A1  |              | -            |             |             |      |
| COL9A3  |              | -            |             |             |      |
| COL13A1 |              | -            |             |             |      |
| COL21A1 |              | -            |             |             |      |
| COL23A1 |              | -            |             |             |      |
| COL9A2  |              | -            |             |             |      |
| COL24A1 | -            |              | -           |             |      |
| COL17A1 | -            |              | -           |             |      |
| COL22A1 | -            |              | -           |             |      |
| COL6A6  | -            |              | -           |             |      |

## C. Proteoglycans

|       | Normal Colon | Normal Liver | Colon Tumor | Liver Tumor | Met. |
|-------|--------------|--------------|-------------|-------------|------|
| ASPN  |              |              |             |             |      |
| BGN   |              |              |             |             |      |
| DCN   |              |              |             |             |      |
| HSPG2 |              |              |             |             |      |
| LUM   |              |              |             |             |      |
| PRELP |              |              |             |             |      |
| PRG2  |              |              |             |             |      |
| PRG3  |              |              |             |             |      |
| VCAN  |              |              |             |             |      |
| OGN   |              |              |             |             |      |
| PRG4  | -            |              | -           |             |      |
| FMOD  |              |              |             |             |      |

## D. ECM Regulators

|          | Normal Colon | Normal Liver | Colon Tumor | Liver Tumor | Met. |
|----------|--------------|--------------|-------------|-------------|------|
| A2M      |              |              |             |             |      |
| AMBIP    |              |              |             |             |      |
| CTSB     |              |              |             |             |      |
| CTSG     |              |              |             |             |      |
| F9       |              |              |             |             |      |
| HRG      |              |              |             |             |      |
| PLG      |              |              |             |             |      |
| SERPINA1 |              |              |             |             |      |
| TGM2     |              |              |             |             |      |
| TIMP3    |              |              |             |             |      |
| ITIH1    |              |              |             |             |      |
| ADAMTSL4 | -            |              |             |             |      |
| CTSD     | -            |              |             |             |      |
| ELANE    |              |              |             |             |      |
| KNG1     | -            |              |             |             |      |
| SERPING1 | -            |              |             |             |      |
| F13A1    |              |              | -           |             |      |
| ITIH2    |              |              | -           |             |      |
| MMP19    |              |              | -           |             |      |
| SERPINH1 |              |              | -           |             |      |
| ITIH5    |              | -            | -           |             |      |
| CTSH     | -            |              | -           |             |      |
| CTSS     | -            |              | -           |             |      |
| F12      | -            |              | -           |             |      |
| SERPINC1 | -            |              | -           |             |      |
| AGT      | -            |              | -           |             |      |
| CSTB     | -            |              | -           |             |      |
| ITIH4    | -            |              | -           |             |      |
| F2       | -            |              | -           |             |      |
| HTRA1    | -            | -            |             |             |      |
| LOXL2    | -            |              | -           |             |      |
| PLOD1    | -            |              | -           |             |      |
| SERPINB1 | -            |              | -           |             |      |
| SERPINE2 | -            |              | -           |             |      |
| ST14     | -            |              | -           |             |      |
| TIMP1    | -            |              | -           |             |      |
| ADAMDEC1 | -            |              | -           |             |      |
| C17orf58 | -            |              | -           |             |      |
| CTSF     | -            |              | -           |             |      |
| CTSL1    | -            |              | -           |             |      |
| CTSZ     | -            |              | -           |             |      |
| F7       | -            |              | -           |             |      |
| ADAM10   | -            |              | -           |             |      |
| ADAM9    | -            |              | -           |             |      |
| ADAMTSL1 | -            |              | -           |             |      |
| LEPRE1   | -            |              | -           |             |      |
| LOXL1    | -            |              | -           |             |      |
| MMP1     | -            |              | -           |             |      |
| MMP11    | -            |              | -           |             |      |
| MMP12    | -            |              | -           |             |      |
| MMP2     | -            |              | -           |             |      |
| MMP9     | -            |              | -           |             |      |
| PLOD2    | -            |              | -           |             |      |
| PLOD3    | -            |              | -           |             |      |
| SERPINA3 | -            |              | -           |             |      |
| SERPINF1 | -            |              | -           |             |      |
| BMP1     | -            |              | -           |             |      |

## E. ECM-affiliated Proteins

|         | Normal Colon | Normal Liver | Colon Tumor | Liver Tumor | Met. |
|---------|--------------|--------------|-------------|-------------|------|
| ANXA1   |              |              |             |             |      |
| ANXA11  |              |              |             |             |      |
| ANXA2   |              |              |             |             |      |
| ANXA6   |              |              |             |             |      |
| LGALS1  |              |              |             |             |      |
| LGALS4  |              |              |             |             |      |
| ANXA4   |              |              |             | -           |      |
| C1QC    |              |              |             | -           |      |
| LGALS3  |              |              |             | -           |      |
| LGALS9  | -            | -            | -           | -           |      |
| LMAN1   |              | -            | -           | -           |      |
| MUC2    |              | -            | -           | -           |      |
| GREM1   |              |              |             |             |      |
| ANXA7   | -            | -            | -           | -           |      |
| ANXA5   | -            | -            | -           | -           |      |
| C1QA    | -            | -            | -           | -           |      |
| C1QB    | -            | -            | -           | -           |      |
| GPC4    | -            | -            | -           | -           |      |
| MUC16   | -            | -            | -           | -           |      |
| SFTPD   | -            | -            | -           | -           |      |
| SEMA3B  | -            | -            | -           | -           |      |
| CLEC11A | -            | -            | -           | -           |      |
| CSPG4   | -            | -            | -           | -           |      |
| FCN1    | -            | -            | -           | -           |      |
| MUC13   | -            | -            | -           | -           |      |
| PLXDC2  | -            | -            | -           | -           |      |
| PLXNB2  | -            | -            | -           | -           |      |
| PLXND1  | -            | -            | -           | -           |      |
| C1QTNF5 | -            | -            | -           | -           |      |
| HPX     | -            | -            | -           | -           |      |

## F. Secreted Factors

|         | Normal Colon | Normal Liver | Colon Tumor | Liver Tumor | Met. |
|---------|--------------|--------------|-------------|-------------|------|
| S100A9  |              |              |             |             |      |
| CXCL12  |              |              |             |             |      |
| S100A4  |              |              |             |             |      |
| S100A6  |              |              |             |             |      |
| WNT2B   |              |              |             |             |      |
| MST1    | -            |              |             |             |      |
| ANGPTL6 |              |              |             |             |      |
| S100A8  | -            |              |             |             |      |
| TCHH    | -            |              |             |             |      |
| HCFC1   | -            |              |             |             |      |
| CBLN4   | -            |              |             |             |      |
| EGFL7   | -            |              |             |             |      |
| INHBE   | -            |              |             |             |      |
| LEFTY1  | -            |              |             |             |      |
| MEGF8   | -            |              |             |             |      |
| S100A11 | -            |              |             |             |      |
| S100A14 | -            |              |             |             |      |
| S100A16 | -            |              |             |             |      |
| TGFB1   | -            |              |             |             |      |
